Development 140, 519–529 (2013) doi:10.1242/dev.087585  
 © 2013. Published by The Company of Biologists Ltd

# De novo DNA methylation of endogenous retroviruses is shaped by KRAB-ZFPs/KAP1 and ESET

Helen M. Rowe<sup>1</sup>, Marc Friedli<sup>1</sup>, Sandra Offner<sup>1</sup>, Sonia Verp<sup>1</sup>, Daniel Mesnard<sup>1</sup>, Julien Marquis<sup>1</sup>, Tugce Aktas<sup>2</sup> and Didier Trono<sup>1,\*</sup>

## SUMMARY

Endogenous retroviruses (ERVs) undergo *de novo* DNA methylation during the first few days of mammalian embryogenesis, although the factors that control the targeting of this process are largely unknown. We asked whether KAP1 (KRAB-associated protein 1) is involved in this mechanism because of its previously defined role in maintaining the silencing of ERVs through the histone methyltransferase ESET and histone H3 lysine 9 trimethylation. Here, we demonstrate that introduced ERV sequences are sufficient to direct rapid *de novo* methylation of a flanked promoter in embryonic stem (ES) cells. This mechanism requires the presence of an ERV sequence-recognizing KRAB zinc-finger protein (ZFP) and both KAP1 and ESET. Furthermore, this process can also take place on a strong cellular promoter and leads to methylation signatures that are subsequently maintained *in vivo* throughout embryogenesis. Finally, we show that methylation of ERVs residing in the genome is affected by knockout of KAP1 in early embryos. KRAB-ZFPs, KAP1 and ESET are thus likely to be responsible for the early embryonic instatement of stable epigenetic marks at ERV-containing loci.

**KEY WORDS:** *De novo* DNA methylation, Endogenous retroviral silencing, KRAB-associated protein 1 (KAP1), TRIM28, TIF1 $\beta$ , KRAB zinc-finger protein (KRAB-ZFP), ESET (SETDB1)

## INTRODUCTION

Endogenous retroviruses (ERVs) account for close to 10% of mammalian genomes (Waterston et al., 2002) and are both drivers of evolution and threats to genetic integrity because of their ability, first, to retrotranspose and, second, to alter the expression of neighbouring genes through *cis*-acting transcriptional influences. In mice, ERVs display residual retrotransposition activity, leading to polymorphic integrations and differential gene regulation between mouse strains (Qin et al., 2010; Takabatake et al., 2008; Zhang et al., 2008). Moreover, around 10% of spontaneous mutations in inbred mice are linked to ERVs (Maksakova et al., 2006), for example dactylaplasia that results from a MusD neoinsertion (Friedli et al., 2008; Kano et al., 2007). In humans, the non-LTR retroelement LINE1 (L1) retains some activity and, remarkably, individuals with Rett syndrome caused by mutations in the DNA methylation-binding protein MeCP2 are more prone to L1 retrotransposition (Muotri et al., 2010).

ERVs are duly inactivated during early embryogenesis by histone modifications and *de novo* DNA methylation (reviewed by Rowe and Trono, 2011). This process counteracts the prior genome-wide erasure of DNA methylation that begins at the zygote phase, leaving transposons in a low methylated state, including L1s and, to a lesser extent, intracisternal A-type particles (IAPs) (Feng et al., 2010; Lane et al., 2003). *De novo* DNA methylation is key to ERV repression from plants to mammals, and involves methylation of cytosine residues at CpG dinucleotides by the enzymes DNMT3A and DNMT3B, which act in conjunction with

their catalytically inactive co-factor DNMT3L (Chedin et al., 2002; Okano et al., 1999; Suetake et al., 2004). Later in development and in adult tissues, levels of *de novo* methyltransferases are reduced compared with those in pre-implantation embryos (Carlson et al., 1992), yet pre-established DNA methylation patterns are perpetuated during DNA replication by the maintenance DNA methyltransferase DNMT1, which is recruited to hemi-methylated DNA by UHRF1 (Bestor et al., 1988; Bostick et al., 2007; Sharif et al., 2007). DNA methylation is particularly crucial for constraining the transcription of some ERVs, including IAPs, the expression of which become uncontrolled following inactivation of DNA methylation machinery (Bourc'his and Bestor, 2004; Chen et al., 2003; Gaudet et al., 2004; Walsh et al., 1998). However, IAPs are still silenced in DNMT1 knockout ES cells unless they are differentiated (Hutnick et al., 2010), highlighting the particular importance of DNA methylation later in development. Interestingly, alterations in ERV DNA methylation patterns impact on the expression of neighbouring genes (Duhl et al., 1994; Macfarlan et al., 2011; Macfarlan et al., 2012; Michaud et al., 1994; Rebollo et al., 2011).

DNA methylation is conditioned by the density and spacing of CpG dinucleotides, can be affected by DNA-binding proteins such as CTCF and REST, and is influenced by the histone code, with methylation of histone 3 at lysine 4 (H3K4) preventing the docking of the DNMT3A–DNMT3L complex (Glass et al., 2009; Jia et al., 2007; Lienert et al., 2011; Okitsu and Hsieh, 2007; Ooi et al., 2007; Stadler et al., 2011; Weber et al., 2007). The factors and pathways that recruit *de novo* DNA methyltransferases to specific genomic targets, notably ERVs, remain largely undefined, although it has recently been shown that DNMT3L and the lysine methyltransferase G9a are factors required for the initiation of proviral *de novo* DNA methylation (Leung et al., 2011; Ooi et al., 2010).

Here, we have investigated the role played in this process by KAP1 (KRAB-associated protein 1, also known as tripartite motif

<sup>1</sup>School of Life Sciences and Frontiers in Genetics Program, Ecole Polytechnique Fédérale de Lausanne (EPFL), 1015 Lausanne, Switzerland. <sup>2</sup>Developmental Biology Unit, EMBL, Meyerhofstrasse 1, 69117 Heidelberg, Germany.

\*Author for correspondence (didier.trono@epfl.ch)

protein 28 – TRIM28 – or TIF1 $\beta$ ), a co-factor to the sequence-specific DNA-binding KRAB zinc-finger proteins (ZFPs), a large family of tetrapod-restricted transcriptional factors that co-evolved with ERVs (Emerson and Thomas, 2009; Friedman et al., 1996; Thomas and Schneider, 2011; Urrutia, 2003). KAP1 has previously been demonstrated to maintain ERVs in a silent state in embryonic stem (ES) cells via the histone methyltransferase ESET (also known as SETDB1) and secondary H3K9 trimethylation (Matsui et al., 2010; Rowe et al., 2010). It is also known that the artificial tethering of a KRAB domain to the vicinity of a promoter can lead to its DNA methylation in transgenic mice but not in ES cells (Wiznerowicz et al., 2007), and that maintenance of imprinting marks depends on ZFP57 and KAP1 (Li et al., 2008; Messerschmidt et al., 2012; Quenneville et al., 2011; Zuo et al., 2012). Of relevance here, the retrovirus murine leukemia virus (MLV) is known to be recognized by the mouse-specific KRAB-ZFP ZFP809 through its proline primer-binding site (PBS Pro) sequence and undergoes KAP1-dependent silencing in embryonic carcinoma (EC) cells (Wolf et al., 2008; Wolf and Goff, 2007; Wolf and Goff, 2009), although it is not known whether these factors are sufficient to promote DNA methylation. MLV-based vectors are themselves prone to DNA methylation weeks after their integration in ES or EC cells, through a process that is independent of the presence of a PBS Pro sequence (Leung et al., 2011; Niwa et al., 1983; Wang et al., 1998), as also documented for the cytomegalovirus (CMV) promoter (Meilinger et al., 2009).

Determining how specific ERVs are targeted for *de novo* DNA methylation is technically challenging, owing to their genomic representation in multiple copies of often differentially methylated status in ES cells and early embryos. To circumvent this difficulty, we inserted previously identified genomic targets of KAP1 derived either from the proximal region of IAPs or from PBS Pro (present in some 146 endogenous MLVs in the C57Bl/6 mouse genome) into lentiviral vectors, either upstream or downstream of a promoter driving a GFP reporter. In both configurations, these introduced retroviral elements were sufficient to induce not only the silencing but, in parallel, *de novo* DNA methylation of the flanking promoter. Methylation was remarkably rapid with an adjacent retroviral promoter (MND), occurring within 48 hours, but slower with a cellular promoter (PGK), occurring within 6 days. For PBS Pro, we could demonstrate that DNA methylation was conditioned by the expression of ZFP809. We then determined that *de novo* DNA methylation of introduced ERVs in ES cells was dependent on both KAP1 and ESET, and that sequence-specific ERV methylation could be recapitulated *in vivo* and maintained through development, with ERV sequences directing DNA methylation of an adjacent retroviral or cellular promoter. Finally, we documented that methylation footprints of genomic ERVs are affected by KAP1 loss in early embryos. These data reveal that KAP1 shapes DNA methylation signatures at ERV-containing loci in early mouse development.

## MATERIALS AND METHODS

### Lentiviral vectors

All MND vectors have been described previously (Rowe et al., 2010). For ERV-directed repression of a cellular promoter, the transfer vector pRRLSIN.cPPT.PGK-GFP.WPRE (available from Addgene) was employed, which contains a human phosphoglycerate kinase 1 (PGK) promoter to distinguish it from the endogenous mouse promoter during methylation analysis. Pro and B2 sequences were cloned into this vector by annealing primers upstream (into the *Xho*I site) or downstream (between

the *Bam*HI and *Age*I sites) of the promoter in the antisense orientation. Or IAP1 or IAP4 [described previously (Rowe et al., 2010)] were cloned upstream of the promoter into the *Xho*I site in the antisense orientation. Cloning was verified by sequencing (Microsynth). Vectors were produced by transient transfection of 293T cells with the transfer vector, packaging and VSVG envelope plasmids (Barde et al., 2010), and titrated on 3T3 fibroblasts.

### Cell culture and flow cytometry

Mouse ES cells were cultured in Glasgow Minimum Essential Media (GMEM, Sigma: G5154) with sodium pyruvate (1 mM; Sigma S8636), MEM non-essential amino acids (1 $\times$ ; Gibco 11140-035), L-glutamine (2 mM; Gibco 25030-024), 2-mercaptoethanol (0.1 mM; Sigma), ES cell tested FBS (Gibco 16141-079) and leukaemia inhibitory factor (LIF, 50 units/500 ml; Chemicon ESG1107). Cells were grown on 0.2% gelatin (Sigma: 48723-500G-F)-coated plates and split every 2 days. ES cell lines used were two KAP1<sup>loxP/loxP</sup> lines called ES3 and ES6, and their derived KAP1-conditional knockout cell lines transduced with tamoxifen (4-OHT)-inducible cre (Rowe et al., 2010). Knockout cells were collected 3–4 days after treatment with 4-OHT (overnight at 1  $\mu$ M; Sigma H7904) as stated. G9a parental or stable knockout ES cells and *Eset*-inducible knockout ES cells were from Yoichi Shinkai (Dong et al., 2008; Matsui et al., 2010; Tachibana et al., 2008) (The RIKEN Institute, Japan). *Dnmt1*<sup>-/-</sup>, *Dnmt3a*<sup>-/-</sup>, *Dnmt3b*<sup>-/-</sup> (triple knockout or TKO) ES cells were from Masaki Okano (Tsumura et al., 2006) (The RIKEN Institute, Japan). F9 EC (embryonic carcinoma) cells, primary mouse embryonic fibroblasts (MEFs), 3T3 fibroblasts and 293T cells were also used where stated. Vector titres and GFP repression were measured by flow cytometry and for KAP1 and ESET knockout experiments, cells were stained with an anti-SSEA-1 PE-conjugated antibody or isotype control (BD Pharmingen: 560142 and 555584) and SSEA-1 high-expressing cells gated for undifferentiated cells.

### Quantitative bisulfite pyrosequencing

Genomic DNA was converted (200 ng/sample) using an EpiTect Bisulfite kit (Qiagen: 59104) and used for PCR (primers, one tagged with biotin, were designed using PyroMark Assay Design Software 2.0). PCR products were checked by Sanger sequencing and verified on agarose gels for each experiment before immobilizing on 96-well plates using a Vacuum Prep Workstation and pyrosequencing using PyroMark Gold Reagents (Qiagen 972804; Center for Integrative Genomics, University of Lausanne, Switzerland). Results were analysed using Pyro Q-CpG Software. Primer sequences are in supplementary material Table S1.

### Immunoblotting

Cells were washed with ice-cold PBS and resuspended in radioimmunoprecipitation buffer to prepare total cell extracts. Protein was quantified by BCA Protein Assay Reagents (Pierce) and normalized for loading on a 10% denaturing SDS-polyacrylamide gel. Wet transfer was performed and primary antibodies used were: anti-KAP1 (Mouse mAb, MAB3662, Chemicon), anti-IAP GAG [a kind gift from Bryan Cullen, Duke University, NC, USA (Bogerd et al., 2006)] and anti-PCNA (mouse mAb, clone PC10, catalog number NA03, Calbiochem).

### 293T cell transfection

Cells were seeded at 1 $\times$ 10<sup>5</sup> per well in a 12-well plate. Then, 100  $\mu$ l transfection mix was prepared per well [containing 6  $\mu$ l FuGene 6 (Promega) and 1  $\mu$ g DNA in serum-free media] and incubated at room temperature for 15 minutes before adding drop-wise to cells.

### Quantification of RNA and DNA copy number

RNA was extracted and qRT-PCR performed as described previously (Rowe et al., 2010). Primer specificity was confirmed by dissociation curves and samples normalized to *Titin*, *Gapdh* or *Eef1a1* in Fig. 2D because it reacts with both human and mouse *Eef1a1*. For *in vivo* experiments, genomic DNA was extracted from embryos to measure DNA copy numbers by performing Taqman qPCR for HIV *Gag*, *GFP* and *Titin* as a normalizer, in comparison with a titration curve of plasmid containing sequences of HIV *Gag*, *GFP* and *Titin*. A cell line with a known number of vector copies was used as a control. Results presented are means of

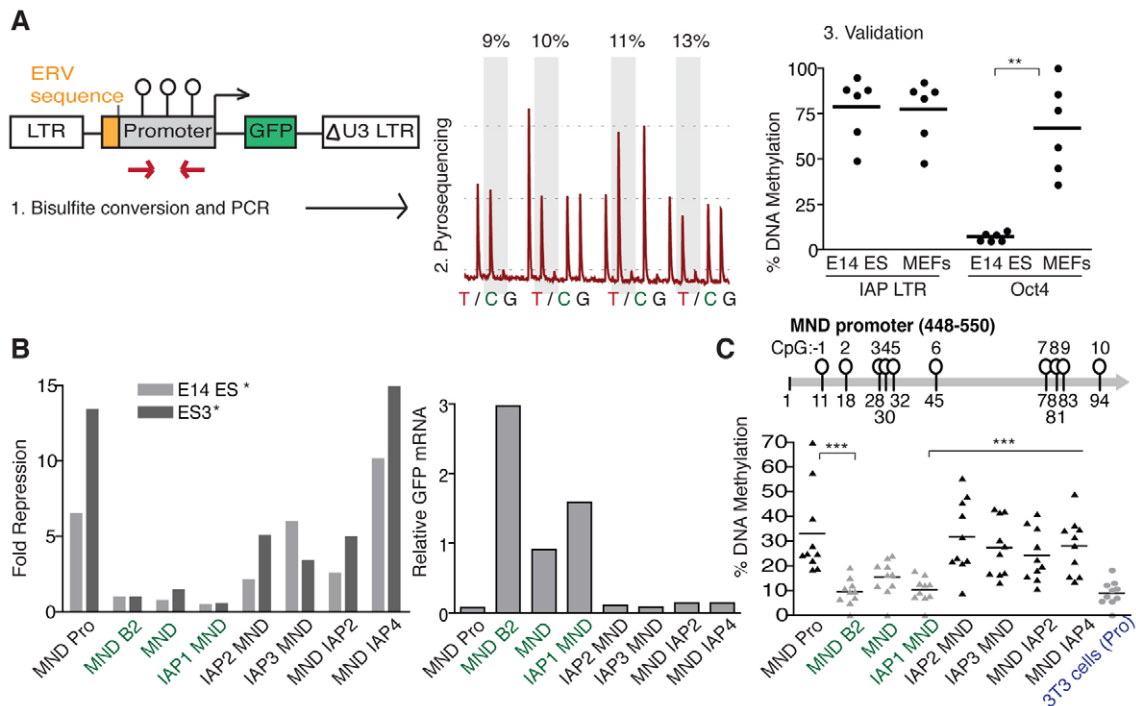

**Fig. 1. ERV sequences can induce rapid *de novo* DNA methylation in ES cells.** (A) The technique we used to measure repression and DNA methylation. (1) In a lentiviral vector, ERV sequences are cloned either immediately upstream (shown here) or downstream (as stated per experiment) of an internal promoter, and repression is measured using GFP. Bisulfite quantitative pyrosequencing of the promoter (2) reveals the ratio of thymine (T) to cytosine (C) at each CpG position (grey) to determine the percentage DNA methylation. (3) Validation with primers for global IAP LTRs and the *Oct4* promoter;  $^{**}P=0.0022$ . Points show individual CpG positions. (B) ERV-directed repression of a GFP reporter in ES cells. (Left) Flow cytometry 4 days post-transduction. All vectors had an internal 'MND' promoter (Rowe et al., 2010), which was empty or contained an ERV sequence (Pro, B2, IAP1, IAP2, IAP3 or IAP4) either upstream (when written before MND) or downstream (when written after MND) of the promoter. Both E14 ES and ES3 ES cell lines showed significant ERV repression ( $^{*}P=0.0260$  and  $^{*}P=0.0311$ , respectively, unpaired one-tailed *t*-tests) compared with control vectors (green). Repression is normalized to the MND B2 control vector and to expression in 3T3 control cells. (Right) GFP mRNA quantification (normalized to *titin*) for one representative cell line 6 days post-transduction; repressed vectors showed significantly less mRNA than controls (green),  $^{*}P=0.0042$  (unpaired one-tailed *t*-test). (C) Day 4 analysis of *de novo* methylation at the MND promoter.  $n=10$  (CpG positions – see map). Here, the methylation profile is also shown for the MND Pro vector in 3T3 control cells. Significant differences in ES cells: the MND Pro versus MND B2 vector ( $^{***}P=0.0006$ ); IAP2 MND ( $^{***}P=0.001$ ) or IAP3 MND or MND IAP2 or MND IAP4 ( $^{***}P\leq 0.0001$  for all) all versus the IAP1 MND control vector.

values obtained for HIV *Gag* and *GFP* primers. See supplementary material Table S1 for primer sequences.

#### Lentiviral transgenesis

Lentiviral vectors for transgenesis were prepared using Episerv medium (Invitrogen 10732022); the particle concentration was obtained by p24 ELISA (Perkin-Elmer: NEK050B001KT) and the infectious titre determined on HCT116 cells using GFP flow cytometry. Vectors for each transgenesis experiment were produced and titred in parallel in order to be in the same range: Fig. 4 titres,  $2\times 10^9$  (IAP2 MND) and  $4\times 10^9$  (MND); Fig. 5 titres,  $1.4\times 10^9$  (PGK Pro) and  $1.2\times 10^9$  (PGK); supplementary material Fig. S4B titres,  $2.3\times 10^9$  (IAP4 PGK) and  $2.4\times 10^9$  (IAP1 PGK). Transgenesis was performed by perivitelline injection of vectors into fertilized oocytes that were transferred to foster mothers (strain B6D2F1/J) and then recovered at E13. Photographs were taken using the same saturation, gain and exposure settings for all embryos, and GFP results displayed all represent the same image processing settings.

#### Statistics

GraphPad Prism version 4.00 (www.graphpad.com) was used for all statistical analyses. For all DNA methylation analyses, two groups (as detailed in the figure legends) were compared across multiple CpG positions using paired two-tailed *t*-tests (except where stated). Any additional statistical analyses are specified in the figure legends.

## RESULTS

### Introduced ERV sequences can induce rapid *de novo* DNA methylation in ES cells

As repeat-derived sequences are largely methylated in ES cells, we set up a method to measure the *de novo* DNA methylation directed at ERV-specific elements by cloning these into lentiviral vectors, a gene transfer system itself not prone to spontaneous methylation, compared with MLV-based vectors (Wang et al., 1998). To quantify levels of *de novo* DNA methylation, we used bisulfite pyrosequencing and verified this technique with primers for endogenous ERVs and the *Oct4* promoter, confirming the latter to be methylated in mouse embryonic fibroblasts (MEFs) but not in ES cells; conversely, the bulk of ERVs harboured this modification in both cell types (Fig. 1A). In ES cells transduced with lentiviral vectors, we confirmed that PBS Pro and previously described KAP1-sensitive IAP elements mediated repression of an adjacent MND retroviral promoter, whether placed upstream or downstream (Fig. 1B; supplementary material Fig. S1A), as previously reported (Rowe et al., 2010). Bisulfite analyses then further revealed that *de novo* DNA methylation systematically correlated with repression, and that it surprisingly was present at 4 days post-transduction

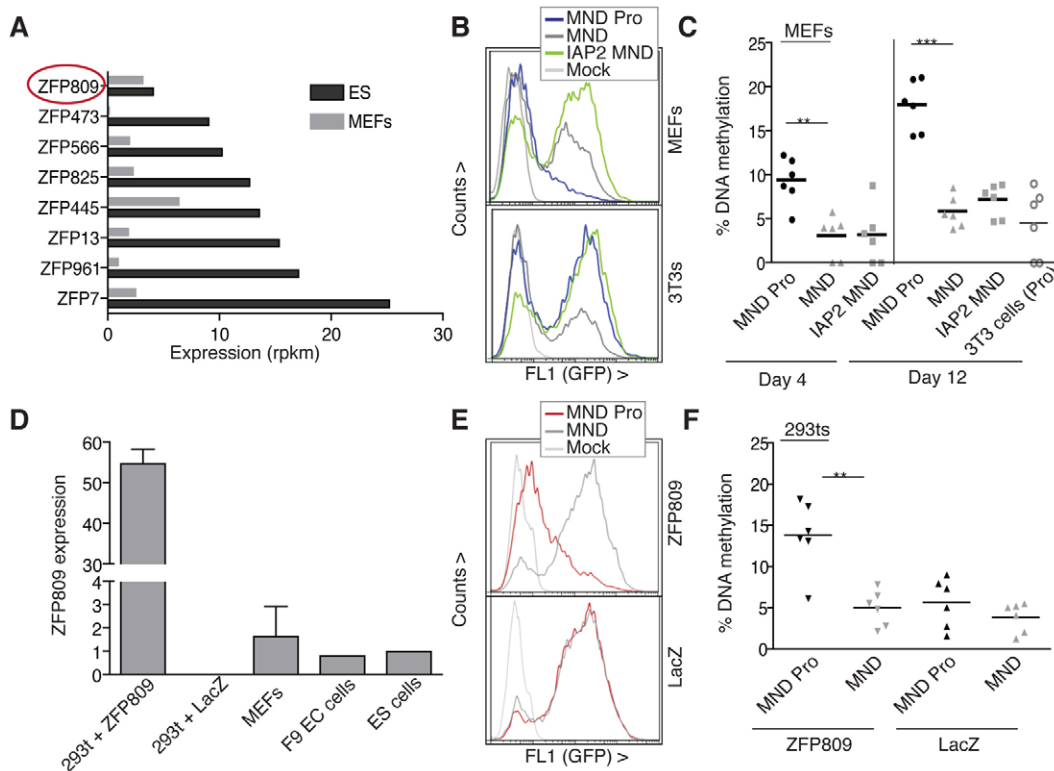

**Fig. 2. ERV DNA methylation patterns are conditioned by KRAB-ZFP expression profiles.** (A) Comparison of expression levels of selected KRAB-ZFPs in ES cells and MEFs based on mRNA-sequencing data. Rpkms indicates the number of sequencing reads normalized by gene length and to the total read number. (B) The Pro sequence is repressed in MEFs where ZFP809 expression is retained. (Top) The MND Pro vector is repressed in MEFs compared with the empty (MND) or IAP2 MND vector, whereas all vectors are highly expressed in 3T3 cells (bottom). Mock indicates nontransduced. (C) The Pro sequence directs *de novo* promoter methylation in MEFs. DNA methylation was measured at days 4 and 12 post-transduction with the stated vectors. Promoter methylation of the MND Pro vector was also measured in 3T3 cells at day 12 as a control. *P*-values:  $**P=0.0052$  (day 4) and  $***P=0.0001$  (day 12). (D) 293t cells were complemented with ZFP809 (or *lacZ* as a control) and expression compared with endogenous levels in the stated cells by qRT-PCR. Data are mean+s.e.m. of triplicate transfections (293t cells), two independent cell lines (MEFs) or individual cell lines (EC and ES cells). (E,F) ZFP809 is responsible for Pro-sequence-directed repression and DNA methylation. 293t cells were transduced with the stated vectors (or nontransduced, Mock) and then transfected with either ZFP809 or *lacZ*. GFP repression (E) and promoter methylation (F) were measured 5 days post-transfection.  $**P=0.0042$ .

(Fig. 1C). A time-course study showed that this process was already under way by day 3 and then progressively increased, with mean levels across the promoter reaching around 75% at day 7 (supplementary material Fig. S1B). Control vectors, whether they contained no KAP1-targeted retroviral sequence, the point-mutated B2 PBS Pro derivative or the previously identified KAP1-insensitive IAP1 element (Rowe et al., 2010), underwent neither repression nor DNA methylation. Moreover, in 3T3 fibroblasts, no ERV-directed promoter methylation was detected, suggesting this process may be restricted to ES cells (Fig. 1C).

### ERV DNA methylation patterns are conditioned by KRAB-ZFP expression profiles

KAP1 has previously been shown to repress ERVs in ES cells and in early embryos (Rowe et al., 2010) and is known to be recruited to specific DNA sequences through KRAB-ZFPs (Friedman et al., 1996; Thomas and Schneider, 2011). One characterized KRAB-ZFP is ZFP809, which targets KAP1 to the PBS Pro sequence (Wolf and Goff, 2007; Wolf and Goff, 2009). As we have previously found ERVs to be regulated by KAP1 in mouse ES cells but not in MEFs (Rowe et al., 2010), we hypothesized that this difference may correlate with the expression profiles of KRAB-ZFPs, especially as

KAP1 is itself still present in MEFs. We therefore used mRNA-sequencing data from ES cells and MEFs to compare expression levels of KRAB-ZFPs between these cell types. Although most KRAB-ZFPs were enriched in ES cells compared with MEFs (although there is no evidence that any of them repress ERVs) (with mean expression levels at 3.421 and 1.4242, respectively), ZFP809 displayed similar levels in the two cell types (Fig. 2A; data not shown). Correspondingly, when we compared the silencing of the PBS Pro and IAP vectors in MEFs, we found the former but not the latter underwent repression in these cells (Fig. 2B), consistent with the lack of activation of endogenous IAPs in MEFs upon KAP1 removal (Rowe et al., 2010). Indeed, we propose that IAPs are already stably methylated in MEFs so it is not necessary for their cognate KRAB-ZFP to be maintained. PBS Pro-induced repression was accompanied by *de novo* DNA methylation in MEFs, albeit at lower levels than in ES cells (Fig. 2C). In order to demonstrate that this mechanism is determined by the presence of the KRAB-ZFP, we complemented human 293T cells with mouse ZFP809, leading to repression but also to significant PBS Pro-dependent DNA methylation of the adjacent promoter (Fig. 2D-F). This level of DNA methylation, however, is not sufficient to maintain silencing, which is reversible (supplementary material Fig. S2).

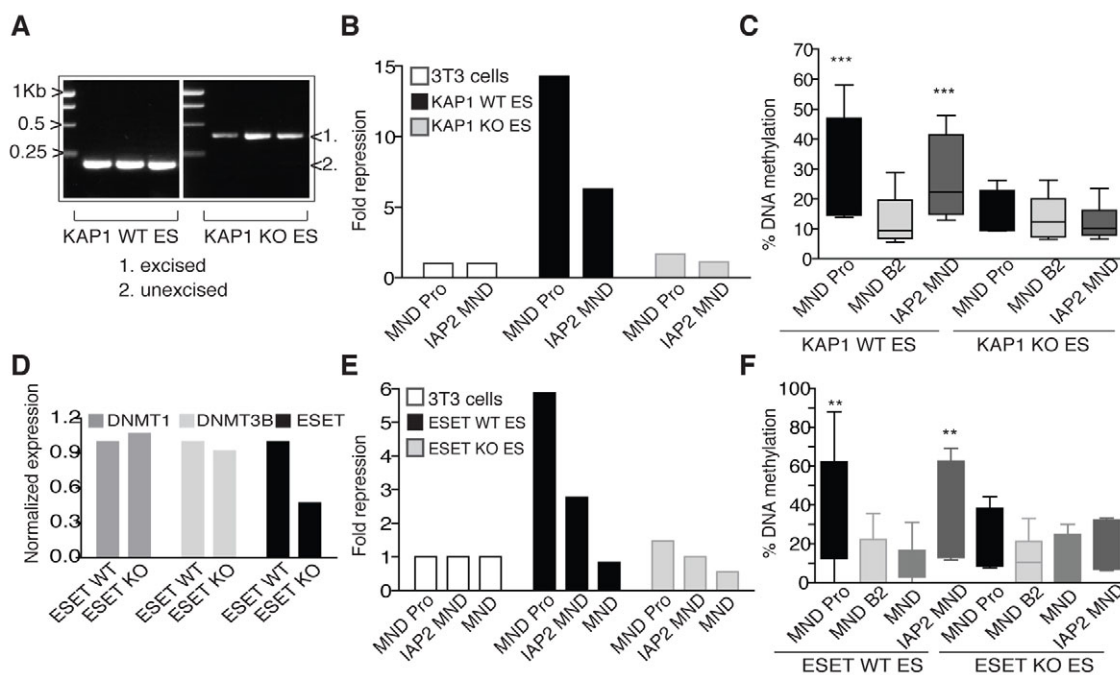

**Fig. 3. KAP1 and ESET are required for *de novo* DNA methylation of ERVs.** (A) *Kap1*-inducible knockout (KO) ES cells were genotyped 3 days post-excision by PCR. Triplicate samples of independently excised cells are shown. The 171 and 390 bp products represent *loxP*-flanked or excised *Kap1*, respectively. (B) Fold repression 48 hours post-vector transduction (and 3 days post-*Kap1* excision). Vectors were titred on 3T3 cells first so that equal infectious units between vectors could be used for transduction of ES cells and 3T3 cells in parallel. Results were then normalized to the MND B2 control vector and to 3T3 cell expression. One representative experiment out of two is shown. (C) The same samples from B were used to assess *de novo* methylation of the MND promoter over 10 CpG positions (see Fig. 1C for a CpG map). One representative experiment out of two is shown. *P*-values: MND Pro versus MND B2, \*\*\**P*=0.0001; IAP2 MND versus MND B2, \*\*\**P*≤0.0001. (D) *Eset*-inducible knockout (KO) ES cells were assessed for a reduction of ESET (or DNMT mRNAs as a control) 3 days post-excision by qRT-PCR. (E) Fold repression 48 hours post-vector transduction (and 3 days post-*Eset* excision) normalized as in B. One representative experiment out of two is shown. (F) The same samples as those in E were used to assess *de novo* methylation of the MND promoter over 10 CpG positions. One representative experiment out of two is shown. *P*-values: MND Pro versus MND B2, \*\**P*=0.0085; IAP2 MND versus MND B2, \*\**P*=0.0014.

### KAP1 and ESET are required for *de novo* DNA methylation of ERVs

In order to determine the role of KAP1 in ERV *de novo* DNA methylation, we used a previously described conditional knockout ES cell line (Rowe et al., 2010). As *Kap1* deletion is ultimately lethal in early embryos and in ES cells (Rowe et al., 2010) (supplementary material Fig. S3), experiments were performed within 3 days of inducing this process (a time-point established from supplementary material Fig. S1B). At that point, both repression and DNA methylation of the lentivirally introduced, IAP- or Pro PBS-flanked promoter could be documented in control cells, whereas both processes were abrogated by KAP1 removal (Fig. 3A-C). Similar experiments in *Eset*-conditional knockout ES cells demonstrated that this histone methyltransferase is also required for ERV-directed repression and *de novo* DNA methylation (Fig. 3D-F). Both KAP1 and ESET are thus necessary not only for the maintenance of proviral silencing (Leung et al., 2011; Matsui et al., 2010; Rowe et al., 2010), but also required initially for *de novo* DNA methylation of introduced ERV sequences.

### ERV-guided KAP1-induced DNA methylation is recapitulated in embryogenesis

*De novo* DNA methylation patterns, which are established early in embryogenesis, are maintained later in development through

the action of DNMT1 (Gaudet et al., 2004; Walsh et al., 1998). We investigated whether DNA methylation marks promoted by KAP1 in ES cells could also be induced *in vivo*, and whether in this setting they were perpetuated until late in embryogenesis. To achieve this, control and KAP1-sensitive IAP sequence-containing MND-GFP lentiviral vectors were injected into fertilized mouse oocytes, and the resulting embryos were collected at E13 to assess integration, repression and promoter methylation. Although all embryos containing the control vector were bright or dull green, none of the IAP LV-harboring embryos expressed GFP to detectable levels, whether examined by microscopy or by flow cytometry (Fig. 4A,B). Of note, MEFs transgenic for the non-repressed promoter displayed variability in GFP intensity within the population, likely owing to KAP1-independent silencing mechanisms, including those relating to integration site differences (Barklis et al., 1986; Ellis, 2005). Strikingly, DNA methylation at E13 mirrored data obtained in ES cells, with high promoter methylation for all IAP vector-harboring embryos, whereas DNA methylation of the lentivirally introduced promoter was lower and more variable in the absence of an adjacent KAP1-tethering element (Fig. 4C). These results suggest that in early embryos, KAP1 machinery acts as a lock to ensure active DNA methylation and thus robust ERV silencing throughout development.

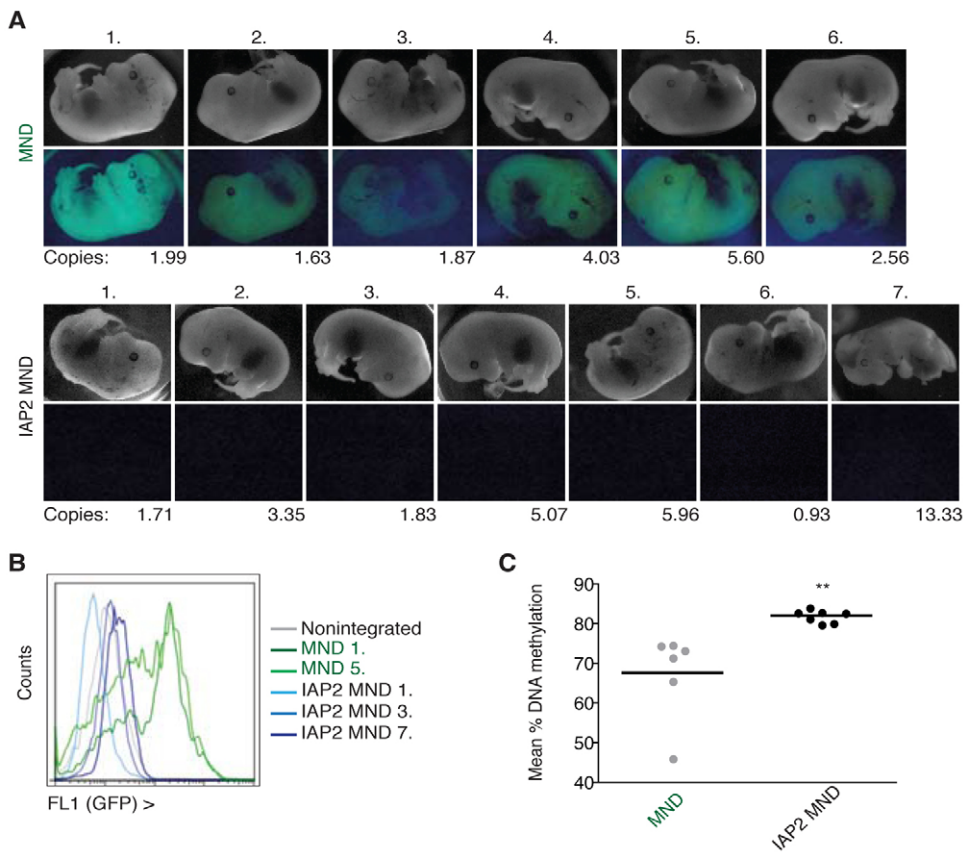

**Fig. 4. ERV-guided KAP1-induced DNA methylation is recapitulated in embryogenesis.** (A) The MND and IAP2 MND vectors were used for lentiviral transgenesis with scoring of embryos for vector integration and GFP expression at E13. For the MND group, six embryos were integrated with copy numbers stated (top) and for the IAP2 MND group, 10 embryos were integrated, none of which were green with seven shown (bottom). (B) MEFs were cultured from sample embryos (indicated on the right) or from a non-integrated embryo as a control, and GFP measured by flow cytometry. (C) Embryos from A ( $n=6$  for MND;  $n=7$  for IAP2 MND) were assessed for methylation of the MND promoter (means are shown per embryo over 10 CpGs).  $**P=0.0057$  (unpaired two-tailed  $t$ -test).

### ERV sequences can induce repression and DNA methylation of a cellular promoter

As cellular promoters can lie in close proximity to ERVs in the genome and ERV methylation status can influence cellular gene expression (Duhl et al., 1994; Macfarlan et al., 2011; Macfarlan et al., 2012; Michaud et al., 1994; Rebollo et al., 2011), we assessed whether our KAP1-dependent ERV sequences could also direct *de novo* DNA methylation of a cellular promoter. PBS Pro could induce some repression of a juxtaposed PGK (phosphoglycerate) promoter, albeit less efficiently than for MND, and with only minimal, if any, DNA methylation at day 3 post-transduction (Fig. 5A). However, by day 6, repression was clear (around sevenfold, supplementary material Fig. S4) so we used this time-point to demonstrate that both PBS Pro and IAP sequences could direct *de novo* DNA methylation of the cellular promoter with levels further increasing after 12 days (Fig. 5B). Furthermore, PBS Pro or a KAP1-sensitive IAP sequence induced repression and DNA methylation of the adjacent PGK promoter when lentiviral vectors containing these elements were used to generate transgenic embryos (Fig. 5C; supplementary material Fig. S4B).

### KAP1 shapes DNA methylation of endogenous retroviruses in ES cells and embryos

Our Southern blot analyses previously failed to detect significant global loss of DNA methylation at ERVs upon *Kap1* deletion (Rowe et al., 2010) but, here, we revisited this issue using the more-sensitive bisulfite pyrosequencing technique to examine ERVs in ES cells and early embryos. As expected, IAPs became highly overexpressed following KAP1 removal in ES cells, which here we record to translate as a marked accumulation of IAP GAG protein (Fig. 6A). We then measured IAP methylation, using the

*Oct4* promoter as a control (Fig. 6B): whereas global IAP LTRs were unaffected in *Kap1*-knockout MEFs, they displayed a mild but significant decrease in knockout ES cells in line with the minimal decrease previously observed at ERVs in *Eset*-knockout ES cells (Matsui et al., 2010). A comparatively greater loss of IAP DNA methylation was measured in an ES cell line stably deleted for the G9a histone methyltransferase (Dong et al., 2008; Tachibana et al., 2008). However, this cell line grows continuously, allowing cumulative decreases in DNA methylation, whereas *Kap1*-deleted cells divide only a few times before dying. The overexpression of IAPs in *Kap1*-deleted cells is most probably a consequence of the removal of histone repressive marks such as H3K9me3 (Matsui et al., 2010; Rowe et al., 2010), especially as we confirmed with conventional bisulphite sequencing at one IAP locus that no molecules are completely or even largely demethylated (supplementary material Fig. S5). However, it is possible that such a small decrease in DNA methylation contributes to the phenotype, particularly as we find that 5-Aza treatment of MEFs induces fairly conservative decreases in IAP DNA methylation (supplementary material Fig. S6), yet a massive upregulation of their transcription (Fig. 7B). Interestingly, we also found, using two different primer sets, that DNA methylation levels at ERVs were mildly but significantly lower in E5.5 *Kap1* knockout embryos compared with wild-type littermates (Fig. 6C; supplementary material Fig. S7). Although only 1 out of 23 further knockout embryos was obtained (at E4.5), probably owing to the high lethality of this mutation, this embryo also displayed less DNA methylation at IAPs than its two control littermates ( $P=0.0002$  and  $0.0014$ , respectively, data not shown). Altogether, these data support a role for KAP1 in genome-wide ERV DNA methylation during early embryogenesis.

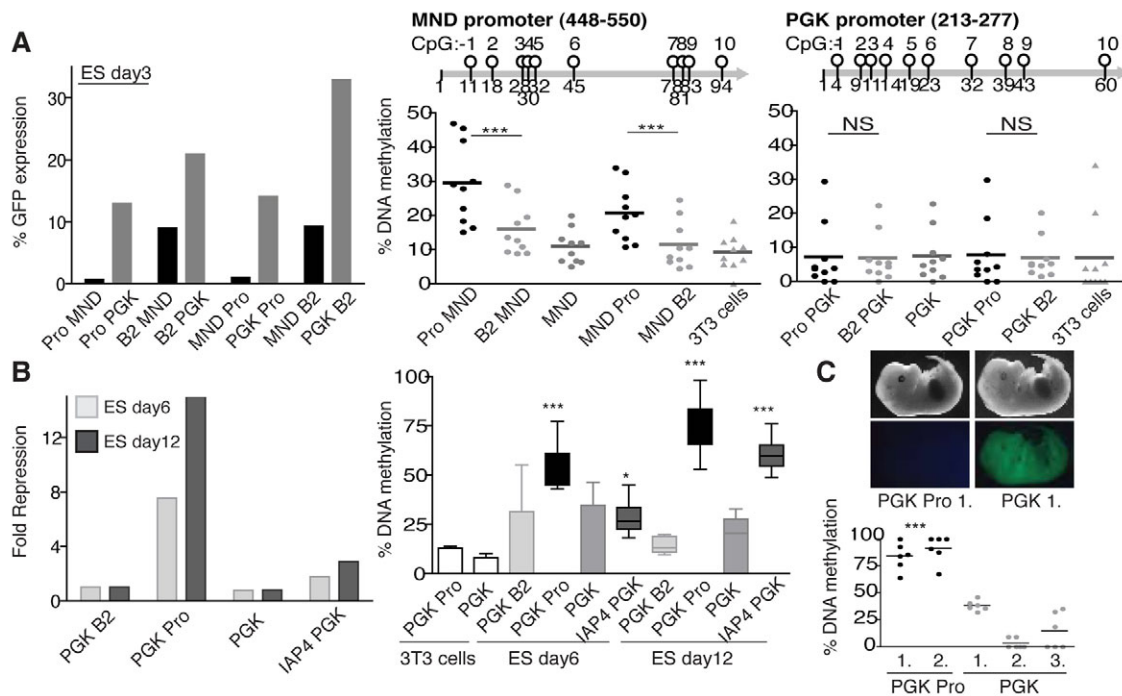

**Fig. 5. ERV sequences can induce repression and DNA methylation of a cellular promoter.** (A) Side-by-side comparison in ES cells of repression and DNA methylation of the MND versus PGK promoter using vectors with either the B2 or Pro sequence cloned upstream (written before) or downstream (written after) of each promoter at day 3. Vectors were normalized on 3T3 cells, which were analysed as a control for DNA methylation (the PGK Pro and MND Pro samples). One representative experiment out of two is shown.  $***P < 0.0001$  (Pro MND versus B2 MND and MND Pro versus MND B2). (B) Fold repression (left, normalized to the PGK B2 vector and to expression in 3T3 cells) and DNA methylation (right) of the PGK promoter within the stated vectors at 6 and 12 days post-transduction. 3T3 cells (day 6) were analysed as a negative control for DNA methylation.  $P$ -values over 10 CpGs for day 6: PGK B2 versus PGK Pro,  $***P \leq 0.0001$  or versus IAP4 PGK,  $*P = 0.0227$ . For day 12: PGK B2 versus PGK Pro,  $***P \leq 0.0001$  or versus IAP4 PGK,  $***P \leq 0.0001$ . (C) The Pro sequence directs methylation of the PGK promoter *in vivo*. None out of the five integrated embryos were green for the PGK Pro vector compared with four out of nine that were green for the empty (PGK) vector. One embryo is shown for each (top) where the copy numbers were 2.4 (PGK Pro) and 2.8 (PGK). Bottom: DNA methylation results for the top embryos and others (numbered). PGK Pro 1 and 2 are significantly more methylated than PGK 1,  $***P = 0.0003$  and  $***P = 0.0004$ , respectively. One representative experiment out of three is shown here.

### DNA methylation becomes crucial for ERV silencing later in development

Finally, in order to address the relevance of DNA methylation of ERV sequences and endogenous ERVs in development, we derived MEFs from transgenic embryos in which our ERV-derived proviruses were integrated. Treatment with the DNA methyltransferase inhibitor 5-aza (but not the HDAC inhibitor, TSA) was sufficient to relieve silencing and this was true for both ERV sequences newly introduced within the context of lentiviral vectors and endogenous IAPs that were upregulated by up to around 700-fold (Fig. 7). To determine whether DNA methylation already played a role in silencing ERVs at an earlier developmental stage, we also examined DNMT triple knockout (TKO) ES cells (Tsumura et al., 2006), in which all three DNA methyltransferases are deleted (supplementary material Fig. S8). Levels of IAP GAG protein and of IAP and MERV-L RNA were significantly higher in these than in control ES cells (supplementary material Fig. S8A,B), consistent with a previous study (Matsui et al., 2010). It was recently reported that in *Dnmt1* KO ES cells and in another ES cell line where all DNMT proteins were depleted (by knockout of *Dnmt3a/3b* and knockdown of *Dnmt1*) (Meissner et al., 2005), IAP protein was detected only upon LIF (leukemia inhibitory factor) withdrawal for six or more days, a time point at which OCT4 protein was

undetected in differentiated cultures by immunofluorescence (Hutnick et al., 2010). However, the TKO ES cells we have used here were maintained in standard ES cell conditions (see Materials and methods) and were largely undifferentiated as indicated by comparable levels of OCT4 protein to wild type (supplementary material Fig. S8A) as well as high surface expression of SSEA1 (supplementary material Fig. S8C), in contrast to ES cells cultured without LIF, which downregulated this marker (supplementary material Fig. S8D). In addition, these cells have previously been found to conserve their self-renewal ability (Tsumura et al., 2006). We still cannot exclude the possibility that some differentiating cells contribute more prominently to the observed IAP upregulation. Importantly, the overexpression of these elements in ES cells (around 40-fold) is modest compared with that seen in MEFs (Fig. 7), supporting a crucial role for DNA methylation in ERV silencing later in development (Gaudet et al., 2004; Walsh et al., 1998), in contrast to in ES cells where KAP1-dependent histone methylation is present (Hutnick et al., 2010; Karimi et al., 2011; Matsui et al., 2010; Rowe et al., 2010) (reviewed by Leung and Lorincz, 2012; Rowe and Trono, 2011). Indeed, both 5-aza treatment and *Kap1* knockout need to be performed in order to induce such a dramatic upregulation of IAPs in ES cells (around 400-fold) (Rowe et al., 2010).

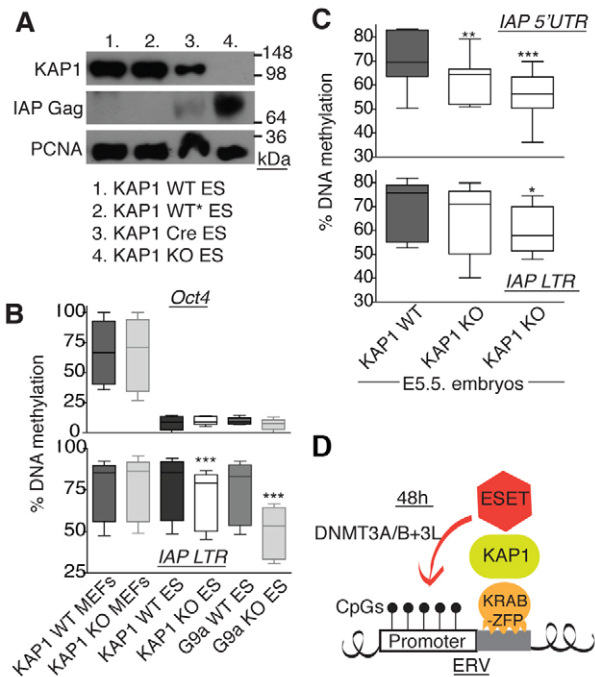

### Fig. 6. KAP1 shapes DNA methylation of endogenous retroviruses in ES cells and embryos.

(A) KAP1 knockout in ES cells leads to an accumulation of IAP GAG p73 expression. ES cells with *loxP*-flanked *Kap1* untreated (1), treated with 4-OHT (2), or transduced with 4-OHT-inducible Cre, without (3) or with (4) 4-OHT. Cells were harvested 4 days post-4-OHT treatment. (B) KAP1 wild-type and knockout ES cells were analysed for DNA methylation of global IAP LTRs (bottom). Methylation of the *Oct4* promoter (top), G9a KO ES cells and KAP1 KO MEFs were used as controls. *P*-values for the IAP LTR: KO MEFs were no different from wild-type MEFs ( $P=0.2186$ ); KAP1 knockout ES cells were significantly different from wild-type ( $P=0.0008$ ) and G9a knockout ES cells were significantly different from wild type ( $P=0.0002$ ). (C) *Kap1* heterozygous mice (C57BL/6) were crossed and embryos dissected at E5.5 to measure DNA methylation of endogenous IAPs using primers either in the 5'UTR (top) or LTR (bottom). Two knockouts and one wild-type embryo were analysed. Top: \*\* $P=0.0059$  and \*\*\* $P=0.0006$ , respectively. Bottom:  $P=0.1613$  (not significant) and \* $P=0.0493$ , respectively (paired one-tailed *t*-tests). (D) Summary model: KRAB-ZFPs, KAP1 and ESET are necessary for *de novo* methylation of ERVs, occurring within 48 hours. This process is sequence specific and takes place in ES cells and during embryogenesis.

### DISCUSSION

The present work demonstrates the involvement of sequence-specific KRAB-ZFPs, KAP1 and ESET in establishing early embryonic DNA methylation patterns at ERV sequences that are subsequently maintained through embryogenesis. This suggests that these factors are required during early development first for the histone-based silencing and then for the *de novo* methylation of genomic ERVs, even though the evidence provided here is limited to newly introduced ERV sequences. Our results support a model (Fig. 6D) whereby sequences located in the 5' region of ERV genomes recruit specific KRAB-ZFPs, KAP1, ESET and most likely other chromatin modifiers, the conjugated action of which leads to transcriptional repression and *de novo* promoter methylation. This phenomenon implies the secondary recruitment of *de novo* DNA methyltransferases, consistent with the documented immunoprecipitation of KAP1 with DNMT3A and

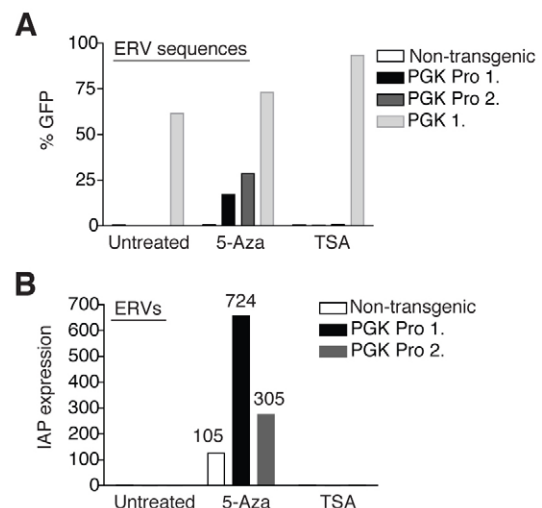

### Fig. 7. DNA methylation of introduced ERV sequences and resident ERVs becomes crucial late in development.

(A) Transgenic MEFs from Fig. 5C and, additionally, a MEF cell line not containing any vector (non-transgenic) were treated with 5-Aza (48 hours) or TSA (24 hours), or left untreated, and GFP measured the next day. Although TSA could increase the GFP content of MEFs that were transgenic for the empty vector (PGK 1), GFP was resurrected only in Pro vector-transgenic MEFs upon addition of 5-Aza. (B) In the same experiment as shown in A, endogenous IAP transcripts were also measured in the stated MEF lines using qRT-PCR. Fold upregulation is shown normalized to untreated controls for each cell line.

DNMT3B (Li et al., 2008; Quenneville et al., 2011; Zuo et al., 2012), and the reported interaction of DNMT3A with the B-Box coiled coil domain of KAP1 (Zuo et al., 2012). As ERV DNA methylation requires ESET, it could be that this enzyme directly recruits DNMT3AB and DNMT3L. In that respect, histone methyltransferases have previously been revealed to act as docking sites for DNA methylation machinery (Dong et al., 2008; Tachibana et al., 2008) and, importantly, ESET has been proposed to bind directly to DNMT3A and tether it to promoters, leading to their DNA methylation-mediated silencing (Li et al., 2006). Alternatively, *de novo* DNA methylation may result indirectly from a lack of transcription and active marks such as H3K4me3 (Jia et al., 2007; Ooi et al., 2007), owing to the recruitment of H3K9me3 and histone deacetylation at ERVs.

We reveal here that KAP1-recruiting ERV sequences are able to trigger repression and *de novo* DNA methylation of a strong cellular promoter, as well as of a retroviral promoter, at least within the context of newly introduced lentiviral vectors. The slower kinetics observed with the PGK promoter, compared with its MND counterpart, may be due to partial protection of its CpG-dense core by transcription factors, as recently proposed (Lienert et al., 2011; Stadler et al., 2011). These data indicate that KAP1-mediated silencing of ERVs may dampen expression from nearby cellular transcription units by inducing promoter CpG methylation. This is supported by our observation that the methylation status of CpG islands correlates with their immediate proximity to KAP1-recruiting sites in ES cells (Quenneville et al., 2012). Relevant to ERVs, in a recent study, polymorphic copies of ERVs across mouse strains were employed to determine whether histone and DNA methylation marks could spread from ERVs to cellular promoters.



Results showed that, whereas H3K9me3 marks could spread several kilobases, it was infrequent for DNA methylation to spread from an IAP to neighbouring gene promoters, except where genes lie within 500 bp of an IAP (Rebollo et al., 2011). Our results now implicate a KAP1/ESET complex in this mechanism. As DNA methylation rarely spreads from ERVs as far as nearby promoters in the genome, in future work it will be interesting to investigate the possible presence of barrier elements protecting cellular genes from the spread of repressive marks, including DNA methylation, which is nucleated at ERV sequences.

Here, we observed significant DNA methylation of a PBS Pro-, retroviral promoter-containing lentiviral vector in MEFs, which express similar levels of ZFP809 to ES cells, as well as in 293T cells engineered to express high levels of this KRAB-ZFP. By contrast, a KAP1-restricted IAP sequence induced neither repression nor *de novo* DNA methylation of the MND promoter in MEFs, suggesting that the cognate KRAB-ZFP is not expressed in these targets. The matching KRAB-ZFP(s) could be any of those enriched in ES cells except ZFP568, which has already been shown not to be responsible for repressing IAPs *in vivo* (Shibata et al., 2011). The induction of only low methylation in MEFs and 293T cells, compared with ES cells, by ZFP809 explains why the repression is reversible, as previously noted when KRAB is artificially tethered to a promoter in cell lines (Barde et al., 2009; Groner et al., 2010; Quenneville et al., 2012; Wiznerowicz and Trono, 2003).

Surprisingly, we found very little decrease in DNA methylation levels at resident ERVs in KAP1 knockout embryos, despite the role we have demonstrated for KAP1 in shaping DNA methylation patterns at ERV sequences in embryogenesis. It could be that the loss of DNA methylation that follows the loss of repressive histone marks cannot be measured accurately owing to the earlier lethality of knockout embryos (at or before E5.5) (Cammass et al., 2000) or that the majority of DNA methylation at genomic ERVs is KAP1 independent at this stage. Along these lines, as IAPs are relatively resistant to genome-wide DNA demethylation in preimplantation embryos (Lane et al., 2003), methylation may be maintained without requiring *de novo* methyltransferase activity. Importantly, this and previous studies (Matsui et al., 2010; Rowe et al., 2010) indicate that histone modifications, rather than DNA methylation, are primarily responsible for silencing ERVs in ES cells, as IAPs become immediately and markedly upregulated upon KAP1 or ESET removal in ES cells, in the absence of any significant change in their DNA methylation status. It is noteworthy that ERVs exhibit a range of DNA methylation rates in ES cells, suggesting that some, including many IAPs, may escape demethylation, whereas others may become demethylated but rapidly re-methylated following their KRAB/KAP1 recognition. Moreover, the impact of DNA methylation per se on transcription, at least during this period, needs to be further investigated, as blocking histone-based repression of IAPs suffices to induce their upregulation. It is possible that subtle alterations at specific positions, which are crucial to block transcription, have so far escaped analyses, or that DNA methylation does not have the same consequences in ES and somatic cells: for example, if some factors important for repressing transcription at DNA methylated loci are expressed in differentiated but not in undifferentiated cells.

Our *in vivo* experiments with vectors reveal that ERV methylation patterns are faithfully copied late into development, leading to extremely high DNA methylation levels (upwards of 80%) that mimic natural levels at IAP LTRs resident in the genome. The self-perpetuating nature of DNA methylation

alleviates the need for the continuous expression of cognate ERV-binding KRAB-ZFP repressors. It also explains why the maintenance of DNA methylation at ERVs throughout development is crucial for suppressing their transcription, notably for IAPs (Walsh et al., 1998). In summary, the present work implies that ERV sequence recognition by KRAB-ZFPs/KAP1 and the lysine methyltransferase ESET is necessary to target ERV-containing loci for rapid *de novo* DNA methylation in early development, leading to stable site-specific DNA methylation signatures across the genome.

#### Acknowledgements

We thank P. V. Maillard for advice; A. Reymond and J. Chrast (from the Center for Integrative Genomics, University of Lausanne, Switzerland) for use of their pyrosequencer; and Carine Gubelmann and Andrea Corsinotti for the ZFP809 plasmid. We also thank D. Schubeler for supplying us with the G9a knockout and parental ES cells, originally from Y. Shinkai (The Riken Institute, Japan), who provided us with the *Eset*-inducible knockout ES cells; and B. Cullen (Duke University) for the anti-IAP GAG antibody. We thank F. Spitz (EMBL, Heidelberg), in whose lab T.A. performed the experiment depicted in supplementary material Fig. S5.

#### Funding

This work was supported by grants from the Swiss National Science Foundation and the European Research Council to D.T.

#### Competing interests statement

The authors declare no competing financial interests.

#### Author contributions

H.M.R. conceived the study, designed and performed the experiments, analyzed the data and wrote the manuscript. S.O., S.V., M.F., D.M. and T.A. contributed to experiments. J.M. provided help with pyrosequencing setup and D.T. conceived the study, designed experiments and wrote the manuscript.

#### Supplementary material

Supplementary material available online at <http://dev.biologists.org/lookup/suppl/doi:10.1242/dev.087585/-/DC1>

#### References

- Barde, I., Laurenti, E., Verp, S., Groner, A. C., Towne, C., Padrun, V., Aebischer, P., Trumpp, A. and Trono, D. (2009). Regulation of episomal gene expression by KRAB/KAP1-mediated histone modifications. *J. Virol.* **83**, 5574-5580.
- Barde, I., Salmon, P. and Trono, D. (2010). Production and titration of lentiviral vectors. *Curr. Protoc. Neurosci.* **53**, 4.21.1-4.21.23.
- Barklis, E., Mulligan, R. C. and Jaenisch, R. (1986). Chromosomal position or virus mutation permits retrovirus expression in embryonal carcinoma cells. *Cell* **47**, 391-399.
- Bestor, T., Laudano, A., Mattaliano, R. and Ingram, V. (1988). Cloning and sequencing of a cDNA encoding DNA methyltransferase of mouse cells. The carboxyl-terminal domain of the mammalian enzymes is related to bacterial restriction methyltransferases. *J. Mol. Biol.* **203**, 971-983.
- Bogerd, H. P., Wiegand, H. L., Doehle, B. P., Lueders, K. K. and Cullen, B. R. (2006). APOBEC3A and APOBEC3B are potent inhibitors of LTR-retrotransposon function in human cells. *Nucleic Acids Res.* **34**, 89-95.
- Bostick, M., Kim, J. K., Estève, P. O., Clark, A., Pradhan, S. and Jacobsen, S. E. (2007). UHRF1 plays a role in maintaining DNA methylation in mammalian cells. *Science* **317**, 1760-1764.
- Bourc'his, D. and Bestor, T. H. (2004). Meiotic catastrophe and retrotransposon reactivation in male germ cells lacking Dnmt3L. *Nature* **431**, 96-99.
- Cammass, F., Mark, M., Dollé, P., Dierich, A., Chambon, P. and Losson, R. (2000). Mice lacking the transcriptional corepressor TIF1beta are defective in early postimplantation development. *Development* **127**, 2955-2963.
- Carlson, L. L., Page, A. W. and Bestor, T. H. (1992). Properties and localization of DNA methyltransferase in preimplantation mouse embryos: implications for genomic imprinting. *Genes Dev.* **6**, 2536-2541.
- Chedin, F., Lieber, M. R. and Hsieh, C. L. (2002). The DNA methyltransferase-like protein DNMT3L stimulates *de novo* methylation by Dnmt3a. *Proc. Natl. Acad. Sci. USA* **99**, 16916-16921.
- Chen, T., Ueda, Y., Dodge, J. E., Wang, Z. and Li, E. (2003). Establishment and maintenance of genomic methylation patterns in mouse embryonic stem cells by Dnmt3a and Dnmt3b. *Mol. Cell. Biol.* **23**, 5594-5605.
- Dong, K. B., Maksakova, I. A., Mohn, F., Leung, D., Appanah, R., Lee, S., Yang, H. W., Lam, L. L., Mager, D. L., Schübeler, D. et al. (2008). DNA

- methylation in ES cells requires the lysine methyltransferase G9a but not its catalytic activity. *EMBO J.* **27**, 2691-2701.
- Duhl, D. M., Vrieling, H., Miller, K. A., Wolff, G. L. and Barsh, G. S. (1994). Neomorphic agouti mutations in obese yellow mice. *Nat. Genet.* **8**, 59-65.
- Ellis, J. (2005). Silencing and variegation of gammaretrovirus and lentivirus vectors. *Hum. Gene Ther.* **16**, 1241-1246.
- Emerson, R. O. and Thomas, J. H. (2009). Adaptive evolution in zinc finger transcription factors. *PLoS Genet.* **5**, e1000325.
- Feng, S., Jacobsen, S. E. and Reik, W. (2010). Epigenetic reprogramming in plant and animal development. *Science* **330**, 622-627.
- Friedli, M., Nikolaev, S., Lyle, R., Arcangeli, M., Duboule, D., Spitz, F. and Antonarakis, S. E. (2008). Characterization of mouse Dactylaplasia mutations: a model for human ectrodactyly SHFM3. *Mamm. Genome* **19**, 272-278.
- Friedman, J. R., Fredericks, W. J., Jensen, D. E., Speicher, D. W., Huang, X. P., Neilson, E. G. and Rauscher, F. J., 3rd (1996). KAP-1, a novel corepressor for the highly conserved KRAB repression domain. *Genes Dev.* **10**, 2067-2078.
- Gaudet, F., Rideout, W. M., 3rd, Meissner, A., Dausman, J., Leonhardt, H. and Jaenisch, R. (2004). Dnmt1 expression in pre- and postimplantation embryogenesis and the maintenance of IAP silencing. *Mol. Cell. Biol.* **24**, 1640-1648.
- Glass, J. L., Fazzari, M. J., Ferguson-Smith, A. C. and Greally, J. M. (2009). CG dinucleotide periodicities recognized by the Dnmt3a-Dnmt3L complex are distinctive at retroelements and imprinted domains. *Mamm. Genome* **20**, 633-643.
- Groner, A. C., Meylan, S., Ciuffi, A., Zangger, N., Ambrosini, G., Dénervaud, N., Bucher, P. and Trono, D. (2010). KRAB-zinc finger proteins and KAP1 can mediate long-range transcriptional repression through heterochromatin spreading. *PLoS Genet.* **6**, e1000869.
- Hutnick, L. K., Huang, X., Loo, T. C., Ma, Z. and Fan, G. (2010). Repression of retrotransposal elements in mouse embryonic stem cells is primarily mediated by a DNA methylation-independent mechanism. *J. Biol. Chem.* **285**, 21082-21091.
- Jia, D., Jurkowska, R. Z., Zhang, X., Jeltsch, A. and Cheng, X. (2007). Structure of Dnmt3a bound to Dnmt3L suggests a model for de novo DNA methylation. *Nature* **449**, 248-251.
- Kano, H., Kurahashi, H. and Toda, T. (2007). Genetically regulated epigenetic transcriptional activation of retrotransposon insertion confers mouse dactylaplasia phenotype. *Proc. Natl. Acad. Sci. USA* **104**, 19034-19039.
- Karimi, M. M., Goyal, P., Maksakova, I. A., Bilenky, M., Leung, D., Tang, J. X., Shinkai, Y., Mager, D. L., Jones, S., Hirst, M. et al. (2011). DNA methylation and SETDB1/H3K9me3 regulate predominantly distinct sets of genes, retroelements, and chimeric transcripts in mESCs. *Cell Stem Cell* **8**, 676-687.
- Lane, N., Dean, W., Erhardt, S., Hajkova, P., Surani, A., Walter, J. and Reik, W. (2003). Resistance of IAPs to methylation reprogramming may provide a mechanism for epigenetic inheritance in the mouse. *Genesis* **35**, 88-93.
- Leung, D. C. and Lorincz, M. C. (2012). Silencing of endogenous retroviruses: when and why do histone marks predominate? *Trends Biochem. Sci.* **37**, 127-133.
- Leung, D. C., Dong, K. B., Maksakova, I. A., Goyal, P., Appanah, R., Lee, S., Tachibana, M., Shinkai, Y., Lehnertz, B., Mager, D. L. et al. (2011). Lysine methyltransferase G9a is required for de novo DNA methylation and the establishment, but not the maintenance, of proviral silencing. *Proc. Natl. Acad. Sci. USA* **108**, 5718-5723.
- Li, H., Rauch, T., Chen, Z. X., Szabó, P. E., Riggs, A. D. and Pfeifer, G. P. (2006). The histone methyltransferase SETDB1 and the DNA methyltransferase DNMT3A interact directly and localize to promoters silenced in cancer cells. *J. Biol. Chem.* **281**, 19489-19500.
- Li, X., Ito, M., Zhou, F., Youngson, N., Zuo, X., Leder, P. and Ferguson-Smith, A. C. (2008). A maternal-zygotic effect gene, Zfp57, maintains both maternal and paternal imprints. *Dev. Cell* **15**, 547-557.
- Lienert, F., Wirbelauer, C., Som, I., Dean, A., Mohn, F. and Schübeler, D. (2011). Identification of genetic elements that autonomously determine DNA methylation states. *Nat. Genet.* **43**, 1091-1097.
- Macfarlan, T. S., Gifford, W. D., Agarwal, S., Driscoll, S., Lettieri, K., Wang, J., Andrews, S. E., Franco, L., Rosenfeld, M. G., Ren, B. et al. (2011). Endogenous retroviruses and neighboring genes are coordinately repressed by LSD1/KDM1A. *Genes Dev.* **25**, 594-607.
- Macfarlan, T. S., Gifford, W. D., Driscoll, S., Lettieri, K., Rowe, H. M., Bonanomi, D., Firth, A., Singer, O., Trono, D. and Pfaff, S. L. (2012). Embryonic stem cell potency fluctuates with endogenous retrovirus activity. *Nature* **487**, 57-63.
- Maksakova, I. A., Romanish, M. T., Gagnier, L., Dunn, C. A., van de Lagemaat, L. N. and Mager, D. L. (2006). Retroviral elements and their hosts: insertional mutagenesis in the mouse germ line. *PLoS Genet.* **2**, e2.
- Matsui, T., Leung, D., Miyashita, H., Maksakova, I. A., Miyachi, H., Kimura, H., Tachibana, M., Lorincz, M. C. and Shinkai, Y. (2010). Proviral silencing in embryonic stem cells requires the histone methyltransferase ESET. *Nature* **464**, 927-931.
- Meilinger, D., Fellinger, K., Bultmann, S., Rothbauer, U., Bonapace, I. M., Klinkert, W. E., Spada, F. and Leonhardt, H. (2009). Np95 interacts with de novo DNA methyltransferases, Dnmt3a and Dnmt3b, and mediates epigenetic silencing of the viral CMV promoter in embryonic stem cells. *EMBO Rep.* **10**, 1259-1264.
- Meissner, A., Gnirke, A., Bell, G. W., Ramsahoye, B., Lander, E. S. and Jaenisch, R. (2005). Reduced representation bisulfite sequencing for comparative high-resolution DNA methylation analysis. *Nucleic Acids Res.* **33**, 5868-5877.
- Messerschmidt, D. M., de Vries, W., Ito, M., Solter, D., Ferguson-Smith, A. and Knowles, B. B. (2012). Trim28 is required for epigenetic stability during mouse oocyte to embryo transition. *Science* **335**, 1499-1502.
- Michaud, E. J., van Vugt, M. J., Bultman, S. J., Sweet, H. O., Davisson, M. T. and Woychik, R. P. (1994). Differential expression of a new dominant agouti allele (Aiapy) is correlated with methylation state and is influenced by parental lineage. *Genes Dev.* **8**, 1463-1472.
- Muotri, A. R., Marchetto, M. C., Coufal, N. G., Oefner, R., Yeo, G., Nakashima, K. and Gage, F. H. (2010). L1 retrotransposition in neurons is modulated by MeCP2. *Nature* **468**, 443-446.
- Niwa, O., Yokota, Y., Ishida, H. and Sugahara, T. (1983). Independent mechanisms involved in suppression of the Moloney leukemia virus genome during differentiation of murine teratocarcinoma cells. *Cell* **32**, 1105-1113.
- Okano, M., Bell, D. W., Haber, D. A. and Li, E. (1999). DNA methyltransferases Dnmt3a and Dnmt3b are essential for de novo methylation and mammalian development. *Cell* **99**, 247-257.
- Okitsu, C. Y. and Hsieh, C. L. (2007). DNA methylation dictates histone H3K4 methylation. *Mol. Cell. Biol.* **27**, 2746-2757.
- Ooi, S. K., Qiu, C., Bernstein, E., Li, K., Jia, D., Yang, Z., Erdjument-Bromage, H., Tempst, P., Lin, S. P., Allis, C. D. et al. (2007). DNMT3L connects unmethylated lysine 4 of histone H3 to de novo methylation of DNA. *Nature* **448**, 714-717.
- Ooi, S. K., Wolf, D., Hartung, O., Agarwal, S., Daley, G. Q., Goff, S. P. and Bestor, T. H. (2010). Dynamic instability of genomic methylation patterns in pluripotent stem cells. *Epigenetics Chromatin* **3**, 17.
- Qin, C., Wang, Z., Shang, J., Bekkari, K., Liu, R., Pacchione, S., McNulty, K. A., Ng, A., Barnum, J. E. and Storer, R. D. (2010). Intracisternal A particle genes: Distribution in the mouse genome, active subtypes, and potential roles as species-specific mediators of susceptibility to cancer. *Mol. Carcinog.* **49**, 54-67.
- Quenneville, S., Verde, G., Corsinotti, A., Kapopoulou, A., Jakobsson, J., Offner, S., Baglivo, I., Pedone, P. V., Grimaldi, G., Riccio, A. et al. (2011). In embryonic stem cells, ZFP57/KAP1 recognize a methylated hexanucleotide to affect chromatin and DNA methylation of imprinting control regions. *Mol. Cell* **44**, 361-372.
- Quenneville, S., Turelli, P., Bojkowska, K., Raclot, C., Offner, S., Kapopoulou, A. and Trono, D. (2012). The KRAB-ZFP/KAP1 system contributes to the early embryonic establishment of site-specific DNA methylation patterns maintained during development. *Cell Rep.* **4**, 766-773.
- Rebollo, R., Karimi, M. M., Bilenky, M., Gagnier, L., Miceli-Royer, K., Zhang, Y., Goyal, P., Keane, T. M., Jones, S., Hirst, M. et al. (2011). Retrotransposon-induced heterochromatin spreading in the mouse revealed by insertional polymorphisms. *PLoS Genet.* **7**, e1002301.
- Rowe, H. M. and Trono, D. (2011). Dynamic control of endogenous retroviruses during development. *Virology* **411**, 273-287.
- Rowe, H. M., Jakobsson, J., Mesnard, D., Rougemont, J., Reynard, S., Aktas, T., Maillard, P. V., Layard-Liesching, H., Verp, S., Marquis, J. et al. (2010). KAP1 controls endogenous retroviruses in embryonic stem cells. *Nature* **463**, 237-240.
- Sharif, J., Muto, M., Takebayashi, S., Suetake, I., Iwamatsu, A., Endo, T. A., Shinga, J., Mizutani-Koseki, Y., Toyoda, T., Okamura, K. et al. (2007). The SRA protein Np95 mediates epigenetic inheritance by recruiting Dnmt1 to methylated DNA. *Nature* **450**, 908-912.
- Shibata, M., Blauvelt, K. E., Liem, K. F., Jr and García-García, M. J. (2011). TRIM28 is required by the mouse KRAB domain protein ZFP568 to control convergent extension and morphogenesis of extra-embryonic tissues. *Development* **138**, 5333-5343.
- Stadler, M. B., Murr, R., Burger, L., Ivanek, R., Lienert, F., Schöler, A., van Nimwegen, E., Wirbelauer, C., Oakeley, E. J., Gaidatzis, D. et al. (2011). DNA-binding factors shape the mouse methylome at distal regulatory regions. *Nature* **480**, 490-495.
- Suetake, I., Shinozaki, F., Miyagawa, J., Takeshima, H. and Tajima, S. (2004). DNMT3L stimulates the DNA methylation activity of Dnmt3a and Dnmt3b through a direct interaction. *J. Biol. Chem.* **279**, 27816-27823.
- Tachibana, M., Matsumura, Y., Fukuda, M., Kimura, H. and Shinkai, Y. (2008). G9a/GLP complexes independently mediate H3K9 and DNA methylation to silence transcription. *EMBO J.* **27**, 2681-2690.
- Takabatake, T., Ishihara, H., Ohmachi, Y., Tanaka, I., Nakamura, M. M., Fujikawa, K., Hirouchi, T., Kakinuma, S., Shimada, Y., Oghiso, Y. et al. (2008). Microarray-based global mapping of integration sites for the retrotransposon, intracisternal A-particle, in the mouse genome. *Nucleic Acids Res.* **36**, e59.

- Thomas, J. H. and Schneider, S.** (2011). Coevolution of retroelements and tandem zinc finger genes. *Genome Res.* **21**, 1800-1812.
- Tsumura, A., Hayakawa, T., Kumaki, Y., Takebayashi, S., Sakaue, M., Matsuoka, C., Shimotohno, K., Ishikawa, F., Li, E., Ueda, H. R. et al.** (2006). Maintenance of self-renewal ability of mouse embryonic stem cells in the absence of DNA methyltransferases Dnmt1, Dnmt3a and Dnmt3b. *Genes Cells* **11**, 805-814.
- Urrutia, R.** (2003). KRAB-containing zinc-finger repressor proteins. *Genome Biol.* **4**, 231.
- Walsh, C. P., Chaillet, J. R. and Bestor, T. H.** (1998). Transcription of IAP endogenous retroviruses is constrained by cytosine methylation. *Nat. Genet.* **20**, 116-117.
- Wang, L., Robbins, P. B., Carbonaro, D. A. and Kohn, D. B.** (1998). High-resolution analysis of cytosine methylation in the 5' terminal repeat of retroviral vectors. *Hum. Gene Ther.* **9**, 2321-2330.
- Waterston, R. H., Lindblad-Toh, K., Birney, E., Rogers, J., Abril, J. F., Agarwal, P., Agarwala, R., Ainscough, R., Alexandersson, M., An, P. et al.** (2002). Initial sequencing and comparative analysis of the mouse genome. *Nature* **420**, 520-562.
- Weber, M., Hellmann, I., Stadler, M. B., Ramos, L., Pääbo, S., Rebhan, M. and Schübeler, D.** (2007). Distribution, silencing potential and evolutionary impact of promoter DNA methylation in the human genome. *Nat. Genet.* **39**, 457-466.
- Wiznerowicz, M. and Trono, D.** (2003). Conditional suppression of cellular genes: lentivirus vector-mediated drug-inducible RNA interference. *J. Virol.* **77**, 8957-8961.
- Wiznerowicz, M., Jakobsson, J., Szulc, J., Liao, S., Quazzola, A., Beermann, F., Aebischer, P. and Trono, D.** (2007). The Kruppel-associated box repressor domain can trigger de novo promoter methylation during mouse early embryogenesis. *J. Biol. Chem.* **282**, 34535-34541.
- Wolf, D. and Goff, S. P.** (2007). TRIM28 mediates primer binding site-targeted silencing of murine leukemia virus in embryonic cells. *Cell* **131**, 46-57.
- Wolf, D. and Goff, S. P.** (2009). Embryonic stem cells use ZFP809 to silence retroviral DNAs. *Nature* **458**, 1201-1204.
- Wolf, D., Cammas, F., Losson, R. and Goff, S. P.** (2008). Primer binding site-dependent restriction of murine leukemia virus requires HP1 binding by TRIM28. *J. Virol.* **82**, 4675-4679.
- Zhang, Y., Maksakova, I. A., Gagnier, L., van de Lagemaat, L. N. and Mager, D. L.** (2008). Genome-wide assessments reveal extremely high levels of polymorphism of two active families of mouse endogenous retroviral elements. *PLoS Genet.* **4**, e1000007.
- Zuo, X., Sheng, J., Lau, H. T., McDonald, C. M., Andrade, M., Cullen, D. E., Bell, F. T., Iacovino, M., Kyba, M., Xu, G. et al.** (2012). Zinc finger protein ZFP57 requires its co-factor to recruit DNA methyltransferases and maintains DNA methylation imprint in embryonic stem cells via its transcriptional repression domain. *J. Biol. Chem.* **287**, 2107-2118.
